# Supplementary material for: Misaligned Chromosomes are a Major Source of Chromosomal Instability in Breast Cancer
Source: PubMed Central journal article supplement (PMC10035514; doi:10.1158/2767-9764.crc-22-0302), 2023-01-12
Supplement: crc-22-0302-s05.pdf [file crc-22-0302-s05.pdf]

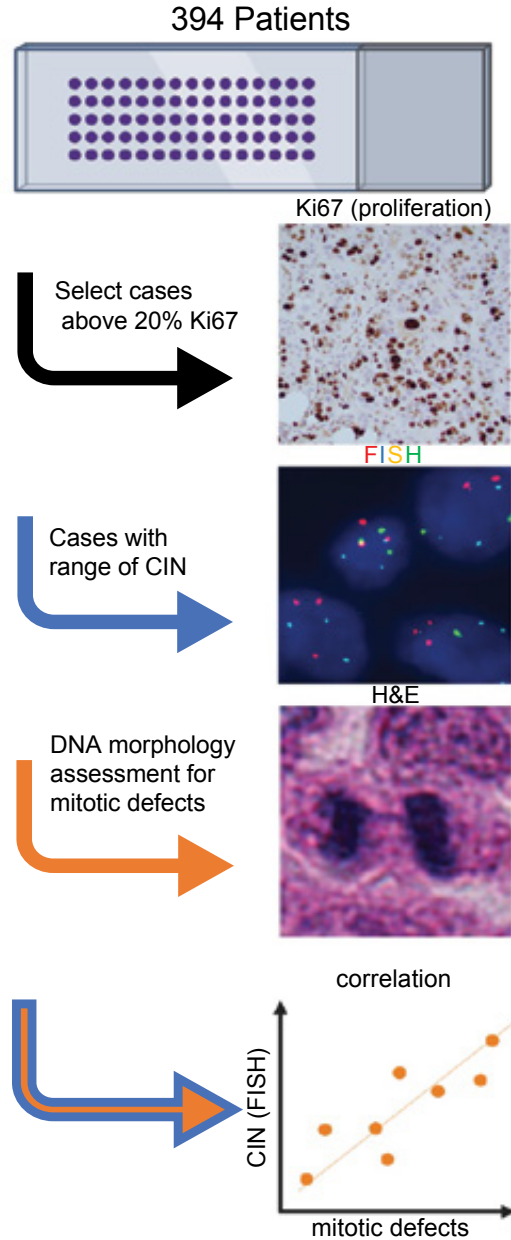

**Figure S1. Pipeline to assess CIN in primary breast cancer.** A. A tissue microarray containing 377 breast cancer and 17 normal breast samples was evaluated for proliferation by Ki67 and CIN based on 6 chromosome FISH (39). H&E stained sections for cases with sufficient proliferation to assess mitotic cells with a range of CIN scores were analyzed for mitotic defects. Linear correlations were used to compare CIN by FISH to mitotic defects in tumor sections.
