# Supplementary material for: Misaligned Chromosomes are a Major Source of Chromosomal Instability in Breast Cancer
Source: PubMed Central journal article supplement (PMC10035514; doi:10.1158/2767-9764.crc-22-0302), 2023-01-12
Supplement: crc-22-0302-s06.pdf [file crc-22-0302-s06.pdf]

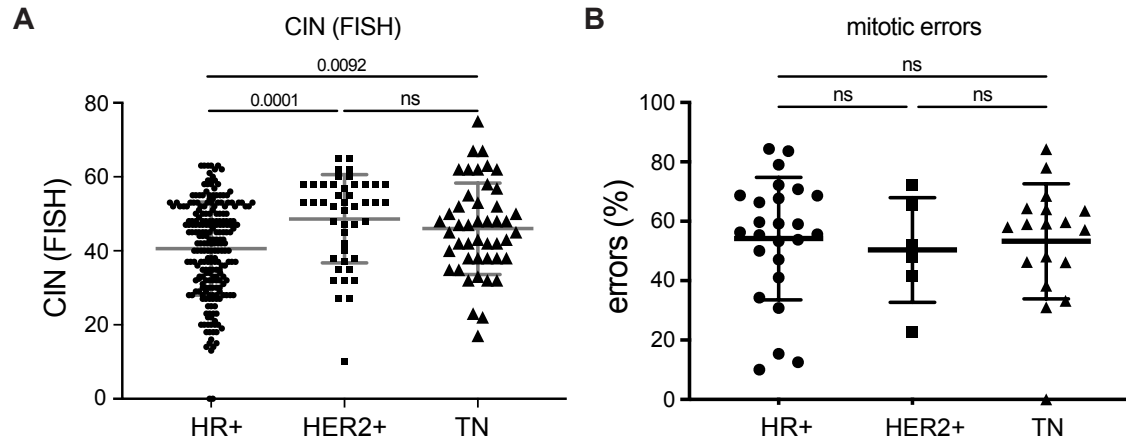

**Figure S2. Breast tumor subtypes show similar rates of mitotic defects.** A. Triple Negative (TN) and HER2+ tumors show higher CIN as assessed by 6-chromosome interphase FISH (see Methods) than hormone (ER and/or PR) receptor positive (HR+) tumors.  $n = 235, 45, 46$  respectively. B. Rates of mitotic defects are similar in all subtypes.
