# Supplementary material for: Misaligned Chromosomes are a Major Source of Chromosomal Instability in Breast Cancer
Source: PubMed Central journal article supplement (PMC10035514; doi:10.1158/2767-9764.crc-22-0302), 2023-01-12
Supplement: crc-22-0302-s07.pdf [file crc-22-0302-s07.pdf]

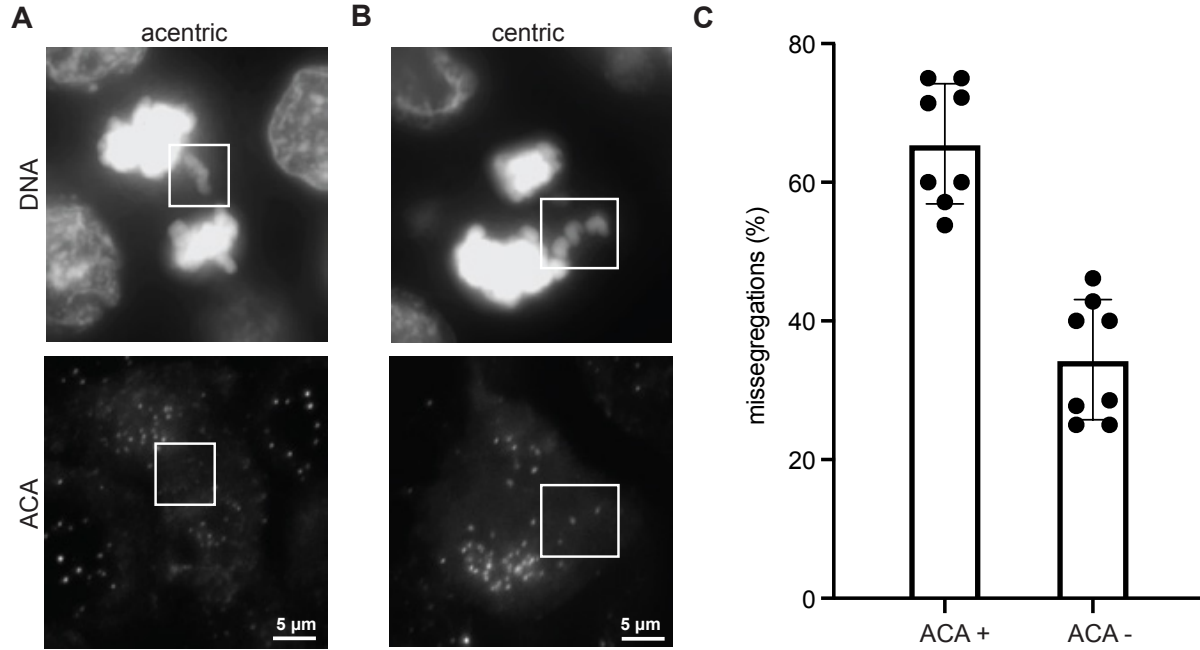

**Figure S3. Lagging chromosomes in breast cancer are primarily mitotic in origin. A-B.**

Images of lagging chromosomes lacking a centromere, which are likely to occur due to pre-mitotic defects (A) or containing their centromere, which are likely to arise due to mitotic defects (B). C. Quantification of lagging chromosomes in 8 primary tumors showing acentric (ACA-) fragments are less frequent than lagging chromosomes containing centromeres. Data represent mean +/- SD.
