# Supplementary material for: Misaligned Chromosomes are a Major Source of Chromosomal Instability in Breast Cancer
Source: PubMed Central journal article supplement (PMC10035514; doi:10.1158/2767-9764.crc-22-0302), 2023-01-12
Supplement: crc-22-0302-s10.pdf [file crc-22-0302-s10.pdf]

**Table S1. Patient characteristics**

| Characteristic                 | Number | Percent |
|--------------------------------|--------|---------|
| <b>Race/Ethnicity</b>          |        |         |
| Caucasian                      | 57     | 96.1%   |
| Black                          | 3      | 1.7%    |
| Asian                          | 1      | 0.8%    |
| Hispanic                       | 0      | 0.6%    |
| Unknown/Other                  | 1      | 0.8%    |
| <b>Sex</b>                     |        |         |
| Female                         | 62     | 100.0%  |
| Male                           | 0      | 0.0%    |
| <b>Age at diagnosis</b>        |        |         |
| <40                            | 7      | 11.3%   |
| 40-49                          | 24     | 38.7%   |
| 50-59                          | 17     | 27.4%   |
| 60-69                          | 5      | 8.1%    |
| 70-79                          | 7      | 11.3%   |
| >=80                           | 2      | 3.2%    |
| <b>Histology</b>               |        |         |
| Ductal or ductal subtype       | 60     | 96.8%   |
| Lobular                        | 0      | 0.0%    |
| Mammary                        | 2      | 3.2%%   |
| Phyllodes                      | 0      | 0.0%    |
| Adenoid cystic                 | 0      | 0.0%    |
| <b>Histological Grade</b>      |        |         |
| 1                              | 7      | 11.3%   |
| 2                              | 12     | 19.5%   |
| 3                              | 42     | 67.6%   |
| Unknown                        | 1      | 1.6%    |
| <b>Stage</b>                   |        |         |
| I                              | 10     | 16.1%   |
| II                             | 43     | 69.4%   |
| III                            | 9      | 14.5%   |
| <b>Hormone Receptor Status</b> |        |         |
| ER+ and/or PR+                 | 33     | 53.2%   |
| ER/PR negative HER2+           | 8      | 12.9%   |
| Triple negative                | 20     | 32.3    |
| Unknown                        | 1      | 1.6%    |
| <b>HER2 Status</b>             |        |         |
| Positive                       | 7      | 11.3%   |
| Negative                       | 50     | 80.6%   |
| Unknown                        | 5      | 8.1%    |
| <b>Regional Node Status</b>    |        |         |
| Positive                       | 32     | 51.6%   |
| Negative                       | 30     | 48.4%   |
| <b>Type of Surgery</b>         |        |         |
| BCS                            | 30     | 48.4%   |
| Mastectomy                     | 32     | 51.6%   |
| No surgery                     | 0      | 0.0%    |
| <b>Recurrence</b>              |        |         |
| Yes                            | 31     | 50.0%   |
| No                             | 31     | 50.0%   |
| <b>Vital Status</b>            |        |         |
| Death due to breast cancer     | 22     | 35.5%   |
| Death due to other cause       | 7      | 11.3%   |
| Alive                          | 33     | 53.2%   |
