# Supplementary material for: Misaligned Chromosomes are a Major Source of Chromosomal Instability in Breast Cancer
Source: PubMed Central journal article supplement (PMC10035514; doi:10.1158/2767-9764.crc-22-0302), 2023-01-12
Supplement: crc-22-0302-s11.pdf [file crc-22-0302-s11.pdf]

**Table S2. Patient characteristics of matched primary and metastatic cases**

| Characteristic          | Number | Percent |
|-------------------------|--------|---------|
| Race/Ethnicity          |        |         |
| Caucasian               | 10     | 83.33%  |
| Black                   | 1      | 8.33%   |
| Asian                   |        | 0.00%   |
| Hispanic                |        | 0.00%   |
| Unknown/Other           | 1      | 8.33%   |
| Sex                     |        |         |
| Female                  | 12     | 100.00% |
| Male                    | 0      | 0.00%   |
| Age at diagnosis        |        |         |
| <40                     | 0      | 0.00%   |
| 40-49                   | 5      | 41.67%  |
| 50-59                   | 5      | 41.67%  |
| 60-69                   | 1      | 8.33%   |
| 70-79                   | 1      | 8.33%   |
| >=80                    |        | 0.00%   |
| Hormone Receptor Status |        |         |
| ER+ and/or PR+          | 8      | 66.67%  |
| ER/PR negative HER2+    | 1      | 8.33%   |
| Triple negative         | 3      | 25.00%  |
| Unknown                 |        | 0.00%   |
| HER2 Status             |        |         |
| Positive                | 2      | 16.67%  |
| Negative                | 10     | 83.33%  |
| Unknown                 | 0      | 0.00%   |
| Recurrence              |        |         |
| Yes                     | 12     | 100.00% |
| No                      | 0      | 0.00%   |
| Site                    |        |         |
| Ovary                   | 1      | 8.33%   |
| Brain                   | 5      | 41.67%  |
| Liver                   | 1      | 8.33%   |
| Lymph Node              | 1      | 8.33%   |
| Bone                    | 2      | 16.67%  |
| Kidney                  | 1      | 8.33%   |
| Lung                    | 1      | 8.33%   |
