# Supplementary material for: Misaligned Chromosomes are a Major Source of Chromosomal Instability in Breast Cancer
Source: PubMed Central journal article supplement (PMC10035514; doi:10.1158/2767-9764.crc-22-0302), 2023-01-12
Supplement: crc-22-0302-s12.pdf [file crc-22-0302-s12.pdf]

**Table S3. Results from multivariable regression, related to Figure 3.**

| Parameter  | Estimate |               |       | P value      |
|------------|----------|---------------|-------|--------------|
| constant   | 0.223    | <b>0.264</b>  | 0.306 |              |
| misaligned | 0.017    | <b>0.061</b>  | 0.105 | <b>0.008</b> |
| lagging    | -0.004   | <b>0.027</b>  | 0.058 | <b>0.088</b> |
| bridge     | 0.022    | <b>0.060</b>  | 0.097 | <b>0.003</b> |
| multipolar | -0.111   | <b>-0.028</b> | 0.056 | <b>0.510</b> |

The constant term estimates mean CIN without observable defects; other variables quantify change in mean CIN per 10 percentage point increase in the given defect. 95% confidence intervals appear as left and right subscripted values.
